# Supplementary material for: Prediction model for aneuploidy in early human embryo development revealed by single-cell analysis
Source: PubMed Central journal article supplement (PMC4506544; doi:10.1038/ncomms8601), 2015-07-07
Supplement: ncomms8601-s1.pdf [file ncomms8601-s1.pdf]

## Supplementary information

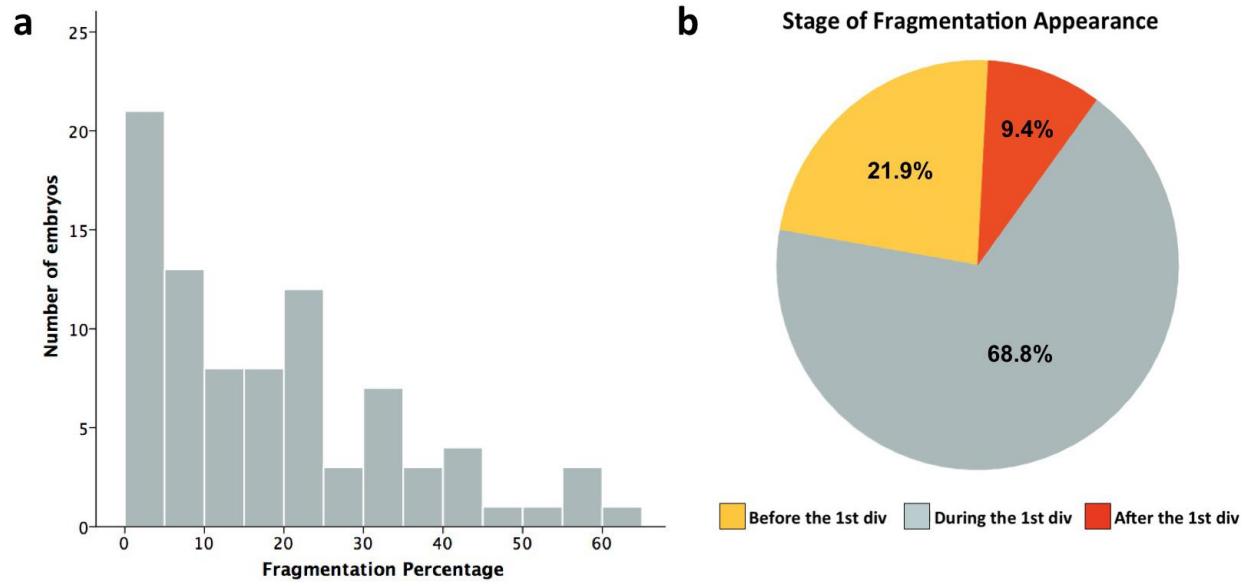

### Supplementary Figure 1. Cellular fragmentation dynamics in human embryos.

(a) The distribution of embryos according to the percentage of fragmentation at collection (n=85). The fragmentation percentage was confirmed via three-dimensional multi-plane imaging.

(b) A pie graph showing that almost all fragmentation appears before (n=14) or during the first division (n=44) with a much smaller percentage appearing after that (n=6). Note that each embryo was annotated by the stage in which fragmentation appeared for the first time.

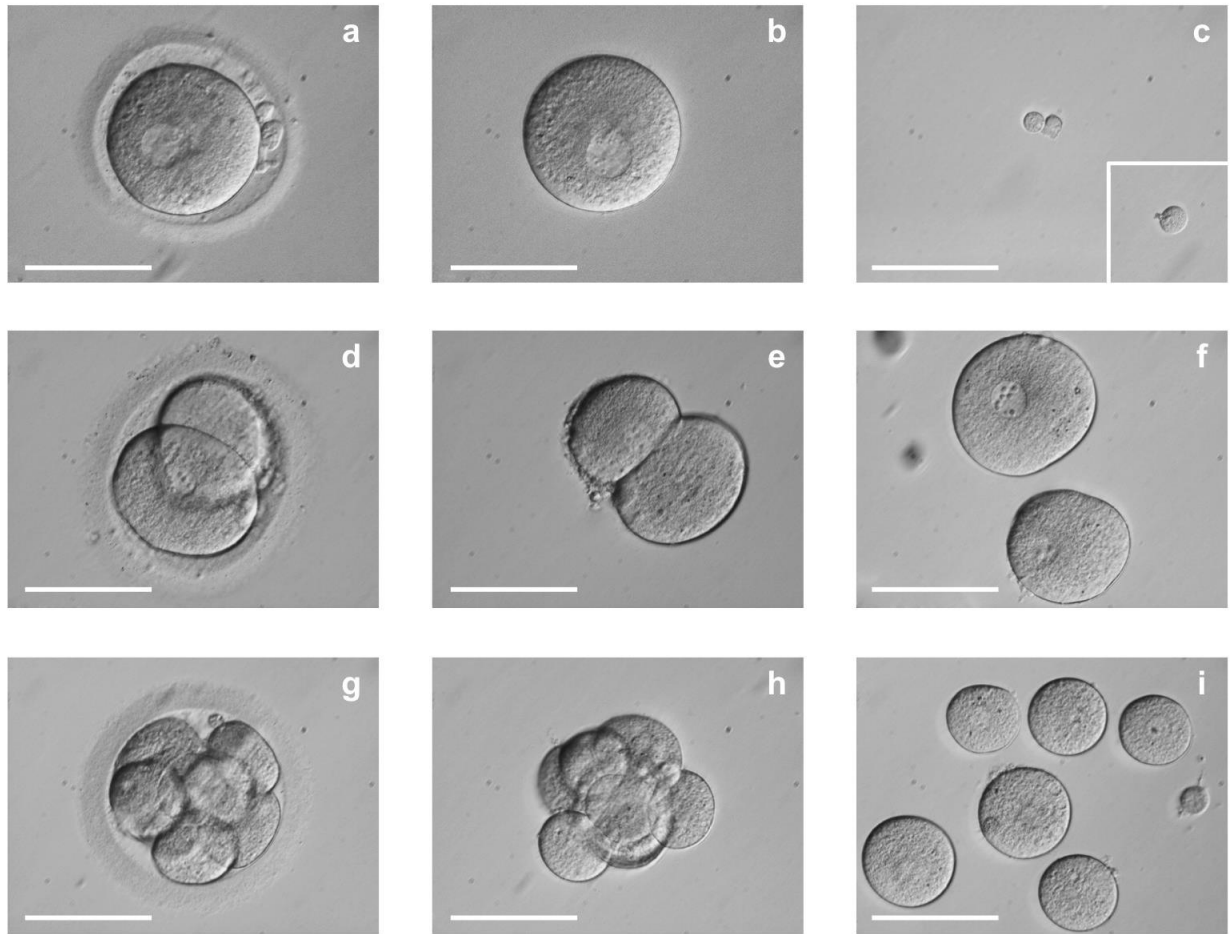

**Supplementary Figure 2. Representative images of embryo disassembly at different stages.** Embryos were removed and disaggregated at different times during development. An embryo at the 1-cell stage (**a**) was detached from its zona pellucida and separated into zygote (**b**) and polar bodies (**c**). Note that the differentiation between first and second polar bodies was not possible. Another embryo at the 2-cell stage (**d**) had its zona pellucida removed (**e**) and was disassembled into individual blastomeres (**f**). An embryo at the 8-cell stage (**g**) was released from the zona pellucida (**h**) and disaggregated into individual cells (**i**). Note that in fragmented embryos, fragments were separated from blastomeres by mechanical pipetting since they may potentially interfere in the results. Scale bar, 100  $\mu\text{m}$ .

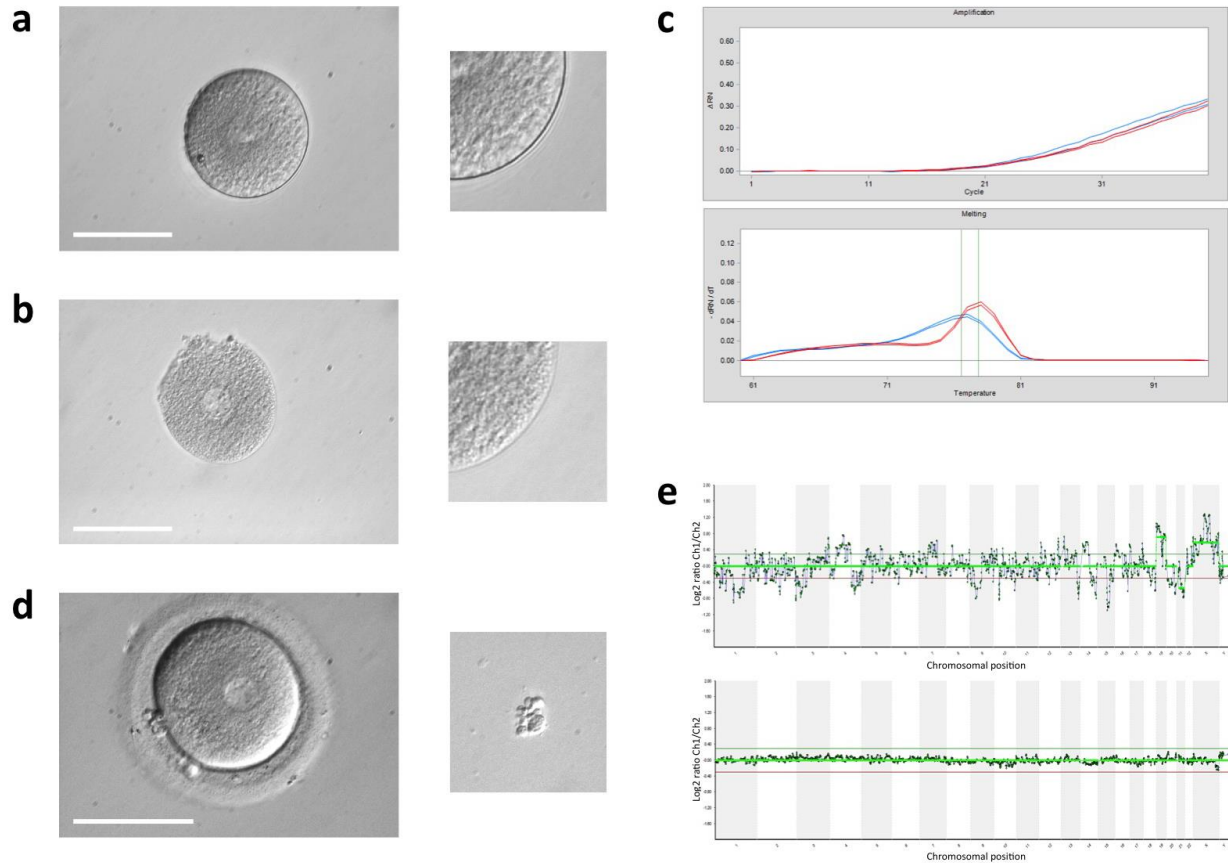

### Supplementary Figure 3. Examples of exclusion criteria.

Since the integrity of the cell membrane could alter gene expression results, only blastomeres with an intact membrane were included (**a**), whereas blastomeres with a compromised membrane (**b**) were disregarded in the analysis. This is based on qPCR curves from blastomeres with an intact membrane (**c**, red lines) and a compromised membrane (**c**, blue lines). Ploidy results were also discarded in cases of a zygote with polar body fragmentation (**d**) since DNA from fragmented polar bodies may be degraded and show an aCGH profile with amplification failure (**e**, top) rather than the typical aCGH profile (**e**, bottom). Scale bar, 100  $\mu$ m.

**Supplementary Table 1. Developmental kinetics of all cultured embryos.**

| <b>Parameter</b>         | <b>N</b> | <b>Q1 (h)</b> | <b>Median (h)</b> | <b>Q3 (h)</b> |
|--------------------------|----------|---------------|-------------------|---------------|
| PNd to First cytokinesis | 48       | 2.33          | 2.71              | 3.15          |
| First cytokinesis        | 67       | 0.25          | 0.33              | 0.50          |
| 2 to 3-cell              | 47       | 0.92          | 11.42             | 14.50         |
| 3 to 4-cell              | 39       | 0.58          | 1.25              | 4.42          |
| 4 to 5-cell              | 21       | 0.71          | 8.08              | 12.25         |
| 5 to 6-cell              | 17       | 0.46          | 2.25              | 7.29          |
| 6 to 7-cell              | 16       | 0.79          | 1.54              | 6.44          |
| 7 to 8-cell              | 14       | 0.50          | 0.79              | 2.17          |
| 8 to 9-cell              | 3        | 0.50          | 1.58              | NA            |

All parameters with the number (N) of embryos analyzed and data distribution times (Q1, 25th percentile; Median, 50th percentile; Q3, 75th percentile) shown in hours (h). PNd, pronuclei disappearance; first cytokinesis, time between the appearance of a cleavage furrow and completion of daughter cells separation.

**Supplementary Table 2. Quadratic regression analysis of gene expression profiles.**

| GENE           | EQUATION COEFFICIENTS |             |                         |                 | PREDICTED EXPRESSION VALUES |               |
|----------------|-----------------------|-------------|-------------------------|-----------------|-----------------------------|---------------|
|                | <i>a</i>              | <i>b(x)</i> | <i>c(x<sup>2</sup>)</i> | <i>P</i> -value | At start time               | At final time |
| <i>ACTB</i>    | 5.91                  | -0.01       | 6.48E-04                | 3.2E-04         | 5.91                        | 7.60          |
| <i>AKT1</i>    | 1.32                  | -0.05       | 8.01E-04                | 2.6E-02         | 1.32                        | 1.05          |
| <i>AURKA</i>   | 13.30                 | 0.01        | -1.37E-03               | <1.0E-06        | 13.30                       | 9.81          |
| <i>AURKB</i>   | 9.71                  | -1.2E-03    | -3.86E-04               | 4.8E-03         | 9.71                        | 8.43          |
| <i>BCL2</i>    | 0.87                  | 0.02        | 8.54E-04                | 1.1E-04         | 0.87                        | 4.50          |
| <i>BRCA1</i>   | 1.56                  | 0.02        | -5.83E-04               | 4.6E-02         | 1.56                        | 0.92          |
| <i>BUB3</i>    | 10.63                 | -0.03       | -1.69E-04               | 2.6E-03         | 10.63                       | 8.42          |
| <i>CASP2</i>   | 0.98                  | 0.05        | -6.55E-04               | 8.3E-04         | 0.98                        | 2.00          |
| <i>CCNA1</i>   | 3.92                  | 0.24        | -2.06E-03               | <1.0E-06        | 3.92                        | 10.93         |
| <i>CCND1</i>   | 0.64                  | 0.03        | 7.00E-04                | 2.0E-06         | 0.64                        | 4.36          |
| <i>CDH1</i>    | 10.17                 | 0.03        | -1.68E-03               | <1.0E-06        | 10.17                       | 6.50          |
| <i>CDK1</i>    | 6.95                  | -0.10       | 2.63E-03                | 1.0E-02         | 6.95                        | 9.60          |
| <i>CDK2</i>    | 1.74                  | -0.01       | 6.24E-04                | 5.8E-03         | 1.74                        | 3.07          |
| <i>CDK7</i>    | 12.05                 | -0.02       | -8.09E-04               | <1.0E-06        | 12.05                       | 8.51          |
| <i>CHEK2</i>   | 6.95                  | -0.01       | -6.11E-04               | 1.2E-05         | 6.95                        | 4.28          |
| <i>CRY1</i>    | 2.85                  | -0.10       | 9.54E-04                | <1.0E-06        | 2.85                        | 0.09          |
| <i>CTCF</i>    | 3.83                  | -0.03       | 1.34E-03                | 4.3E-04         | 3.83                        | 6.24          |
| <i>CTNNB1</i>  | 9.19                  | -0.02       | -2.33E-04               | 4.7E-04         | 9.19                        | 7.28          |
| <i>DDX20</i>   | 2.99                  | -0.01       | 9.04E-04                | 2.8E-02         | 2.99                        | 5.02          |
| <i>DDX4</i>    | 4.46                  | -0.02       | -1.54E-04               | 8.0E-06         | 4.46                        | 2.66          |
| <i>DNMT1</i>   | 7.22                  | -0.03       | -8.63E-04               | <1.0E-06        | 7.22                        | 3.03          |
| <i>DNMT3A</i>  | 7.49                  | 0.03        | -1.17E-03               | 8.2E-05         | 7.49                        | 5.54          |
| <i>DNMT3B</i>  | 4.23                  | -1.6E-03    | -8.87E-04               | 1.2E-05         | 4.23                        | 1.36          |
| <i>DPPA3</i>   | 11.85                 | -0.05       | 1.67E-03                | 1.7E-02         | 11.85                       | 14.02         |
| <i>E2F1</i>    | 1.25                  | -0.05       | 5.09E-04                | <1.0E-06        | 1.25                        | 0.23          |
| <i>FASLG</i>   | 1.03                  | 0.09        | -3.23E-04               | <1.0E-06        | 1.03                        | 4.82          |
| <i>GADD45A</i> | 1.87                  | 0.17        | -1.42E-03               | <1.0E-06        | 1.87                        | 6.94          |
| <i>GAPDH</i>   | 9.59                  | 0.04        | -4.36E-04               | 3.6E-02         | 9.59                        | 10.19         |
| <i>GATA4</i>   | 3.03                  | 0.01        | -9.43E-04               | 8.0E-06         | 3.03                        | 0.36          |
| <i>INCENP</i>  | 5.59                  | -0.01       | -3.15E-04               | 3.6E-04         | 5.59                        | 4.06          |
| <i>MCL1</i>    | 4.32                  | -0.07       | 2.89E-03                | <1.0E-06        | 4.32                        | 9.55          |
| <i>MSH3</i>    | 4.26                  | 0.02        | -1.16E-03               | 2.0E-06         | 4.26                        | 1.65          |
| <i>MSH6</i>    | 0.07                  | -0.01       | 1.01E-03                | <1.0E-06        | 0.07                        | 2.72          |

|               |       |       |           |          |       |       |
|---------------|-------|-------|-----------|----------|-------|-------|
| <i>NLRP5</i>  | 1.32  | -0.04 | 5.22E-04  | 7.5E-05  | 1.32  | 0.51  |
| <i>NPM2</i>   | 7.27  | 0.04  | -1.65E-03 | 6.0E-06  | 7.27  | 4.54  |
| <i>OOEP</i>   | 11.01 | -0.03 | -2.27E-04 | 2.4E-05  | 11.01 | 8.45  |
| <i>PADI6</i>  | 11.83 | 0.04  | -2.02E-03 | <1.0E-06 | 11.83 | 7.89  |
| <i>PDCD5</i>  | 9.41  | -0.03 | -7.92E-04 | <1.0E-06 | 9.41  | 5.18  |
| <i>POT1</i>   | 8.52  | -0.02 | -1.57E-04 | 1.8E-02  | 8.52  | 6.84  |
| <i>POU5F1</i> | 8.10  | -0.02 | 9.06E-04  | 8.8E-03  | 8.10  | 9.70  |
| <i>RAD52</i>  | 0.23  | -0.01 | 1.09E-03  | 2.0E-06  | 0.23  | 2.85  |
| <i>RBI</i>    | 6.20  | -0.02 | -6.55E-04 | 5.2E-03  | 6.20  | 2.99  |
| <i>RCC2</i>   | 8.81  | -0.01 | -3.12E-04 | 4.6E-05  | 8.81  | 7.34  |
| <i>RPLP0</i>  | 6.76  | -0.03 | 1.49E-03  | 7.0E-06  | 6.76  | 9.96  |
| <i>RPS24</i>  | 5.95  | -0.02 | 1.09E-03  | 9.9E-03  | 5.95  | 8.08  |
| <i>SOX2</i>   | 0.28  | -0.02 | 1.88E-03  | <1.0E-06 | 0.28  | 4.82  |
| <i>TERF2</i>  | 7.16  | -0.01 | -2.11E-04 | 2.7E-05  | 7.16  | 5.81  |
| <i>TP53</i>   | 5.64  | 0.01  | -1.11E-03 | 1.0E-06  | 5.64  | 2.48  |
| <i>TSC2</i>   | 1.33  | -0.01 | -1.60E-04 | 2.9E-02  | 1.33  | 0.17  |
| <i>TUBG1</i>  | 6.11  | -0.03 | 7.91E-05  | 1.2E-04  | 6.11  | 4.79  |
| <i>XPA</i>    | 2.89  | -0.06 | 2.92E-04  | <1.0E-06 | 2.89  | 0.18  |
| <i>YBX2</i>   | 3.38  | -0.05 | 1.56E-05  | <1.0E-06 | 3.38  | 0.59  |
| <i>YY1</i>    | 7.43  | -0.03 | 1.85E-03  | 2.0E-06  | 7.43  | 11.41 |
| <i>ZAR1</i>   | 4.88  | 0.13  | -1.08E-03 | <1.0E-06 | 4.88  | 8.66  |
| <i>ZSCAN4</i> | 1.61  | 0.15  | -1.37E-04 | <1.0E-06 | 1.61  | 9.33  |

ANOVA test was performed to evaluate the regression accuracy. Only genes with  $P$ -value<0.05 are shown. Predicted log<sub>2</sub> values ( $y$ ) were obtained by using the quadratic equation ( $y=a+bx+cx^2$ ) for the start time ( $x = 0$ ) and the final time ( $x = 56h$ ).

**Supplementary Table 3. Significant Gene Ontology terms for genes differentially expressed between aneuploid and euploid embryos.**

| <b>GO:Term</b> | <b>Term name</b>                                 | <b>C</b> | <b>G</b> | <b>Adjusted P-value</b> |
|----------------|--------------------------------------------------|----------|----------|-------------------------|
| GO:0007049     | Cell cycle                                       | 11       | 941      | 1.14E-07                |
| GO:0022402     | Cell cycle process                               | 9        | 640      | 1.19E-06                |
| GO:0000278     | Mitotic cell cycle                               | 8        | 470      | 1.98E-06                |
| GO:0051726     | Regulation of cell cycle                         | 7        | 314      | 2.94E-06                |
| GO:0051301     | Cell division                                    | 6        | 281      | 4.51E-05                |
| GO:0051716     | Cellular response to stimulus                    | 8        | 865      | 1.05E-04                |
| GO:0006259     | DNA metabolic process                            | 7        | 640      | 1.56E-04                |
| GO:0033554     | Cellular response to stress                      | 7        | 623      | 1.56E-04                |
| GO:0034984     | Cellular response to DNA damage stimulus         | 6        | 383      | 1.56E-04                |
| GO:0006974     | Response to DNA damage stimulus                  | 6        | 423      | 2.38E-04                |
| GO:0051329     | Interphase of mitotic cell cycle                 | 4        | 109      | 4.29E-04                |
| GO:0019953     | Sexual reproduction                              | 6        | 484      | 4.29E-04                |
| GO:0051325     | Interphase                                       | 4        | 115      | 4.52E-04                |
| GO:0051246     | Regulation of protein metabolic process          | 6        | 508      | 4.52E-04                |
| GO:0048609     | Reproductive process in a multicellular organism | 6        | 506      | 4.52E-04                |
| GO:0006281     | DNA repair                                       | 5        | 330      | 9.96E-04                |

Only GO terms with adjusted  $P$ -value < 0.001 (Fisher exact test) are shown. C, Number of genes annotated by the given term in the test set; G, Number of genes annotated by the given term in the reference set.

**Supplementary Table 4. Primers for gene expression analysis by RT-qPCR.**

| <b>Target Gene</b> | <b>Gene ID</b> | <b>Forward primer</b>   | <b>Reverse primer</b>      | <b>Product Length</b> |
|--------------------|----------------|-------------------------|----------------------------|-----------------------|
| <i>AHR</i>         | 196            | AGCCGGTGCAGAAAACAGTA    | GGTCTCTATGCCGCTTGGAA       | 75                    |
| <i>AKT1</i>        | 207            | CCATCACACCACCTGACCAA    | CGAGTAGGAGAAGCTGGGGGA      | 83                    |
| <i>ALKBH2</i>      | 121642         | CTGTTTGGCAAAGCTGAGGC    | GGGGCCAGTTCTCTTTCATCA      | 127                   |
| <i>APC</i>         | 324            | GGGCTTACTAATGACCACTACA  | TGCAGCCTTTCATAGAGCATA      | 118                   |
| <i>ATM</i>         | 472            | TGCTTGCTGTTGTGGACTA     | ATCCAGCCAGAAAGCATCA        | 80                    |
| <i>AURKA</i>       | 6790           | GGTGGTCAGTACATGCTCCA    | GCATCCGACCTTCAATCATTTCA    | 90                    |
| <i>AURKB</i>       | 9212           | ATGGAGAATAGCAGTGGGACAC  | CAGAGGACGCCCAATCTCAA       | 78                    |
| <i>BAD</i>         | 572            | CTCCGGAGGATGAGTGACGA    | CACCAGGACTGGAAGACTCG       | 125                   |
| <i>BAX</i>         | 581            | GGGTTGTCGCCCTTTTCTAC    | TCTTGGATCCAGCCCAACA        | 136                   |
| <i>BCL2</i>        | 596            | AGGGTACGATAACCGGGAGAT   | CATCCCACTCGTAGCCCTC        | 74                    |
| <i>BRCA1</i>       | 672            | AAGACTGCTCAGGGCTATCC    | CCATTTCTGCTGGAGCTTTA       | 96                    |
| <i>BRCA2</i>       | 675            | ATGCAGCAGACCCAGCTTA     | TCCTTTTGTTCAGCAGATTCCA     | 148                   |
| <i>BUB1</i>        | 699            | ACAAGCTTCCAGTGGAGTCA    | AATCCAAAAGTCGCCTGGGTA      | 84                    |
| <i>BUB3</i>        | 9184           | CTGCATACGAGCGTTTCCAAA   | GGCTTGGGTCCAAAATACTCAAC    | 86                    |
| <i>CASP2</i>       | 835            | AACTGCCCAAGCCTACAGAA    | TTGGTCAACCCACGATCA         | 84                    |
| <i>CCNA1</i>       | 8900           | GCTCGTAGGAACAGCAGCTA    | CAAACCTCGTCTACTTCAGGAGGATA | 74                    |
| <i>CCND1</i>       | 595            | ATCTACACCGACAACCTCCATCC | GGTTCCACTTGAGCTTGTTTAC     | 79                    |
| <i>CCNE1</i>       | 898            | ATACTTGCTGCTTCGGCCTT    | TCAGTTTTGAGCTCCCCGTC       | 148                   |
| <i>CCT3</i>        | 7203           | CCCGATGTGGTCATCACTGAA   | CTCTGCGGATGGCTGTGATA       | 85                    |
| <i>CDH1</i>        | 999            | CGTCACCACAAATCCAGTGAAC  | TACTGCTGCTTGGCCTCAAA       | 78                    |
| <i>CDK1</i>        | 983            | CCTAGTACTGCAATTCGGGAAA  | CCTGCATAAGCACATCCTGAA      | 85                    |
| <i>CDK2</i>        | 1017           | TGGGCCCGCAAGATTTTAG     | TGTTAGGGTCGTAGTGCAGC       | 91                    |
| <i>CDK7</i>        | 1022           | GGGAGCCCCAATAGAGCTTATA  | CTACACCATACATCCTAGCTCCA    | 91                    |
| <i>CETN2</i>       | 1069           | GGAGTTGGGTGAGAACCTGAC   | TCTTGCTCACTGACCTCTCC       | 90                    |
| <i>CFL1</i>        | 1072           | GCTCCAAGGACGCCATCA      | TCCTTGACCTCCTCGTAGCA       | 79                    |
| <i>CHEK1</i>       | 1111           | TGGTACAACAAACCCCTCAA    | CACTGGGAGACTCTGACAC        | 76                    |
| <i>CHEK2</i>       | 11200          | GCCCTTCAGGATGGATTTGC    | ACAGCTTTTGTCCCTCCCAAA      | 72                    |
| <i>CLOCK</i>       | 9575           | CCTGAGACAGCTGCTGACAA    | ACGGCCGTGTGAGATGATTT       | 149                   |
| <i>CRY1</i>        | 1407           | AACCAGCAGATGTGTTTCCC    | CCTTTCAAAGGGCTCAGAA        | 87                    |
| <i>CTCF</i>        | 10664          | GCGGCTTTTGTCTGTTCTAA    | CTGGGCCAGCACAATTATCA       | 85                    |
| <i>DDX20</i>       | 11218          | ATGCATCGGATTGGGAGAGC    | TTTTCTTCTCTCCCCGGCA        | 80                    |
| <i>DIAPH1</i>      | 1729           | TCCCTTCGTGTGTCTCTCAA    | TAAGGAGGCCAAGCCTTCA        | 75                    |
| <i>DNMT1</i>       | 1786           | GCCATTGGCTTGGAGATCA     | AGCAGCTTCTCCTCCTTTA        | 84                    |
| <i>DNMT3A</i>      | 1788           | AGCCTCAATGTTACCCTGGAAC  | TACGCACACTCCAGAAAGCA       | 83                    |



|                |        |                            |                          |     |
|----------------|--------|----------------------------|--------------------------|-----|
| <i>DNMT3B</i>  | 1789   | GTGAAGCACGAGGGGAATATCA     | TTCCGCCAATCACCAAGTCA     | 100 |
| <i>DPPA3</i>   | 359787 | AAGACCAACAAACAAGGAGCC      | TCCCATCCATTAGACACGCAG    | 90  |
| <i>E2F1</i>    | 1869   | AGTCATTGCCAAGAAGTCCAA      | TCCTGGGTCAACCCCTCAA      | 94  |
| <i>ECT2</i>    | 1894   | GCTGTGTCGACATGTAGCTAA      | CAAAGGATTCTGGATCAGCAGTA  | 80  |
| <i>FASLG</i>   | 356    | CTTGGTAGGATTGGGCCTGG       | TGTGTGCATCTGGCTGGTAG     | 91  |
| <i>GADD45A</i> | 1647   | GCGACCTGCAGTTTGAATA        | CTTTCGGTCTTCTGCTCTCCA    | 63  |
| <i>INCENP</i>  | 3619   | AGCAGAAGGCTTGCCAAGAA       | ATTCAGGAGCCTCTCCAGGTAA   | 87  |
| <i>MAD2L1</i>  | 4085   | AGATCACAGCTACGGTGACA       | TGTGGTCCCGACTCTTCC       | 118 |
| <i>MBD4</i>    | 8930   | TGGAAGCTTCTCATCGCTAC       | GCTGAAGGATACTTCTCCAGAAAC | 95  |
| <i>MCL-1</i>   | 4170   | TGGGTTTGTGGAGTTCTTCCA      | CTCCAGCAACACCTGCAAAA     | 83  |
| <i>MRE11A</i>  | 4361   | AGCCAGAGAAGCCTCTTGTA       | TCTGGCTAAAGCGAAGAACAC    | 81  |
| <i>MSH2</i>    | 4436   | GCCCAGGATGCCATTGTAA        | TTGAGTGTCTGCATTGGTTCTAC  | 71  |
| <i>MSH3</i>    | 4437   | TGCCATTGCCTATGCTACAC       | GGCGGATAATGGGTGACAAA     | 78  |
| <i>MSH6</i>    | 2956   | CCAAGGCGAAGAACCTCAAC       | TTGGCCCAAACCAAATCTCC     | 97  |
| <i>NPM2</i>    | 10361  | AAGAAGATGCAGCCGGTCAC       | GGGAGAAAGCTGCACTCCTAC    | 84  |
| <i>OOEP</i>    | 441161 | GTGCCTGGCATGGTTTCAC        | TCTGATGCATGGGCCTTCAA     | 87  |
| <i>PADI6</i>   | 353238 | GTACGCCACAGTGAAGATGACA     | ATCCTCGTTGGGCCCATAGTA    | 85  |
| <i>PCNT</i>    | 5116   | TCTCTGGAAGGTTTCAGCCG       | CGCACCATCTGCAGTAAAGC     | 88  |
| <i>PDCD5</i>   | 9141   | GGCCCAACAGGAAGCAAAA        | ACTGATCCAGAACTTGGGCTA    | 71  |
| <i>PER1</i>    | 5187   | TCTGCCGTATCAGAGGAGGT       | GGTCACATACGGGGTTAGGC     | 77  |
| <i>PLK1</i>    | 5347   | GCAGCGTGCAGATCAACTTC       | CTCGTCGATGTAGGTACACGG    | 83  |
| <i>POT1</i>    | 25913  | CGAGGTAGAAAAGATGTCAACAGCTA | CACATAGTGGTGTCTCTCCAAA   | 77  |
| <i>POU5F1</i>  | 5460   | GCTTGGGCTCGAGAAGGATG       | CATAGTCGCTGCTTGATCGC     | 80  |
| <i>PRMT1</i>   | 3276   | AGTTCACACGCTGCCACAA        | GTCTGCTTCCAGTGCCTGTA     | 73  |
| <i>PTTG1</i>   | 9232   | GCCTCAGATGATGCCTATCCA      | TCAGGCAGGTCAAACTCTCA     | 80  |
| <i>RAD51</i>   | 5888   | GGGAAGACCCAGATCTGTCA       | ATGTACATGGCCTTTCCTTAC    | 86  |
| <i>RAD52</i>   | 5893   | GGATCTTGGGACCTCCAACTTA     | TCTTCATGTCCTGGCTCTTCC    | 85  |
| <i>RBI</i>     | 5925   | CTCACCTCCCATGTTGCTCA       | GGGTGTTTCGAGGTGAACCAT    | 73  |
| <i>RCC2</i>    | 55920  | TGCCTGTACCAAACGTGGTT       | GGAGAAGACTCGCTTCTGGG     | 86  |
| <i>RPL10L</i>  | 140801 | CGAGGTGCCTTTGGAAAACC       | TTCTGAAGCTTGGTGCGGAT     | 86  |
| <i>RPS24</i>   | 6229   | CGAATCGTGGTTCTCTTTCTCTC    | TAGTGCGGATAGTTACGGTGTG   | 79  |
| <i>SMARCA4</i> | 6597   | TCCGTGGTGAAGGTGTCTTA       | AGCAAGACGTTGAACTTCCC     | 89  |
| <i>TERF1</i>   | 7013   | CAGCTTGCCAGTTGAGAACG       | GGGCTGATTCCAAGGGTGTGTA   | 117 |
| <i>TERF2</i>   | 7014   | CCACCGTTCTCAACCAACC        | AACCCCATTAGAGCTGTTCCA    | 80  |
| <i>TERT</i>    | 7015   | CGCCTGAGCTGTACTTTGTCA      | TGATGATGCTGGCGATGACC     | 93  |
| <i>TP53</i>    | 7157   | GTGTGGTGGTGCCCTATGAG       | CGCCCATGCAGGAACTGTTA     | 90  |
| <i>TSC2</i>    | 7249   | GCTGAACATCATCGAACGGC       | CGTGGAACCTCGTTCTGGTCA    | 122 |

|               |        |                          |                          |    |
|---------------|--------|--------------------------|--------------------------|----|
| <i>TUBG1</i>  | 7283   | GGCTCATGATGGCCAACC       | CGCTTACGCAGCTTGTGATA     | 79 |
| <i>XPA</i>    | 7507   | ACATCATTCAACAATGGGGTGATA | ACCCCAAACCTCAAGAGACC     | 76 |
| <i>YBX2</i>   | 51087  | GTCTGGGCACTGTCAAA        | AAAGACATCTTCCTTGGTGTCA   | 81 |
| <i>YY1</i>    | 7528   | CCAAGAACAATAGCTTGCCCTCA  | TGTTTTCTCATGGCCGAGTTATCC | 71 |
| <i>ZARI</i>   | 326340 | TGTGTGGTGTGTACAGGGAAC    | TCCTCCACTCGGTAAGGGTT     | 90 |
| <i>ZSCAN4</i> | 201516 | CCCGGGATTACCCAGTCAA      | AGTCTCTTGCCTTGTGTCTCTA   | 91 |
| <i>ACTB</i>   | 60     | NA                       | NA                       | NA |
| <i>CTNNB1</i> | 1499   | NA                       | NA                       | NA |
| <i>DDX4</i>   | 54514  | NA                       | NA                       | NA |
| <i>GAPDH</i>  | 2597   | NA                       | NA                       | NA |
| <i>GATA4</i>  | 2626   | NA                       | NA                       | NA |
| <i>KHDC3L</i> | 154288 | NA                       | NA                       | NA |
| <i>MLH1</i>   | 4292   | NA                       | NA                       | NA |
| <i>NLRP5</i>  | 126206 | NA                       | NA                       | NA |
| <i>RPLP0</i>  | 6175   | NA                       | NA                       | NA |
| <i>SOX2</i>   | 6657   | NA                       | NA                       | NA |

---

NA, DNA sequence not available.
